# Supplementary material for: Gut microbiota develop towards an adult profile in a sex-specific manner during puberty
Source: PubMed Central journal article supplement (PMC8640005; doi:10.1038/s41598-021-02375-z), 2021-12-02

Suppl. Fig. 1

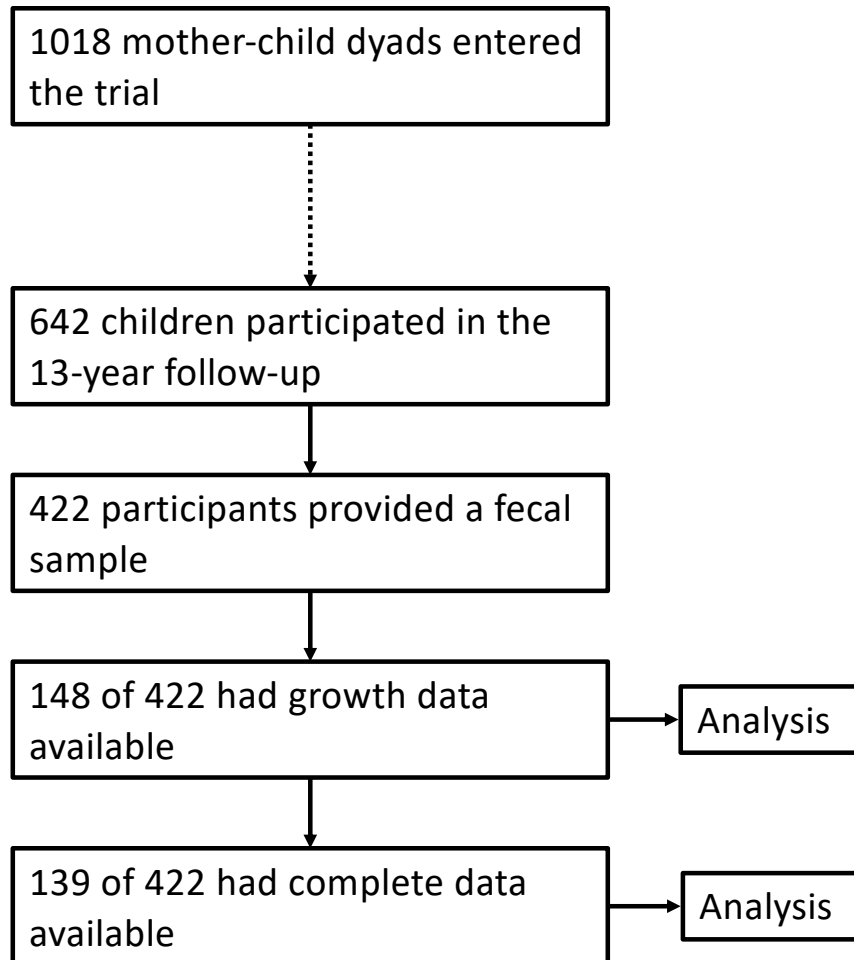

Supplement: 41598_2021_2375_MOESM2_ESM.pdf [file 41598_2021_2375_MOESM2_ESM.pdf]
