# Supplementary material for: Gut microbiota develop towards an adult profile in a sex-specific manner during puberty
Source: PubMed Central journal article supplement (PMC8640005; doi:10.1038/s41598-021-02375-z), 2021-12-02
Supplement: 41598_2021_2375_MOESM6_ESM.pdf [file 41598_2021_2375_MOESM6_ESM.pdf]

Suppl. Table 1

Comparison of the whole cohort participating 13-year follow-up and the analyzed cohort

|                               | Whole cohort<br>(n=642) |                |                | Analyzed cohort<br>(n=139) |               |               |
|-------------------------------|-------------------------|----------------|----------------|----------------------------|---------------|---------------|
|                               | All                     | Boys           | Girls          | All                        | Boys          | Girls         |
| Girls                         | 50.2%<br>(322)          | -              | -              | 56.1%<br>(78)              | -             | -             |
| Birth weight (g)<br>(SD)      | 3588<br>(484)           | 3498<br>(458)  | 3678<br>(493)  | 3452<br>(468)              | 3429<br>(409) | 3481<br>(537) |
| Birth height (cm)<br>(SD)     | 50.6<br>(2.0)           | 50.0<br>(1.9)  | 51.0<br>(2.0)  | 50.2<br>(2.2)              | 49.8<br>(1.8) | 50.7<br>(2.5) |
| Born with caesarean section   | 17.0%<br>(109)          | 17.1%<br>(55)  | 16.9%<br>(54)  | 15.8%<br>(22)              | 12.8%<br>(10) | 19.7%<br>(12) |
| Parents with higher education | 51.9%<br>(333)          | 49.1%<br>(158) | 54.7%<br>(175) | 56.8%<br>(79)              | 56.4%<br>(44) | 57.4%<br>(35) |
| Asthma                        | 16.8%<br>(108)          | 13.4%<br>(43)  | 20.3%<br>(65)  | 7.2%<br>(10)               | 5.1%<br>(4)   | 9.8%<br>(6)   |
| Other chronic disease         | 11.7%<br>(75)           | 11.5%<br>(37)  | 11.9%<br>(38)  | 13.7%<br>(19)              | 11.5%<br>(9)  | 16.4%<br>(10) |
| BMI at 5 years<br>(SD)        | 15.8<br>(1.3)           | 15.8<br>(1.5)  | 15.8<br>(1.2)  | 15.6<br>(1.4)              | 15.6<br>(1.5) | 15.7<br>(1.3) |
| Uses fiber rich foods daily   | 71.2%<br>(457)          | 71.1%<br>(229) | 71.2%<br>(228) | 62.6%<br>(87)              | 61.5%<br>(48) | 63.9%<br>(39) |
