# Supplementary material for: Gut microbiota develop towards an adult profile in a sex-specific manner during puberty
Source: PubMed Central journal article supplement (PMC8640005; doi:10.1038/s41598-021-02375-z), 2021-12-02
Supplement: 41598_2021_2375_MOESM7_ESM.pdf [file 41598_2021_2375_MOESM7_ESM.pdf]

Suppl. Table 2  
Self-reported Tanner staging (pubic hair) of the participants

|       | Boys          | Girls         |
|-------|---------------|---------------|
| Stage |               |               |
| 1     | 26.2%<br>(16) | 14.8%<br>(12) |
| 2     | 32.8%<br>(20) | 27.2%<br>(22) |
| 3     | 23.0%<br>(14) | 46.9%<br>(38) |
| 4     | 16.4%<br>(10) | 6.2%<br>(5)   |
| 5     | 1.6%<br>(1)   | 4.9%<br>(4)   |
